# Supplementary material for: APC/CCDC20 and APC/C play pivotal roles in the process of embryonic development in Artemia sinica
Source: PubMed Central journal article supplement (PMC5171921; doi:10.1038/srep39047), 2016-12-19

**APC/C<sup>CDC20</sup> and APC/C play pivotal roles in the process of embryonic development in *Artemia sinica***

Mengchen Zhang<sup>a,+</sup>, Feng Yao<sup>a,+</sup>, Hong Luan<sup>a</sup>, Wei Zhao<sup>a</sup>, Ting Jing<sup>a</sup>, Shuang Zhang<sup>a</sup>, Lin Hou<sup>a,\*</sup>, Xiangyang Zou<sup>b,\*\*</sup>

<sup>a</sup> College of Life Sciences, Liaoning Normal University, Dalian 116081, China

<sup>b</sup> Department of Biology, Dalian Medical University, Dalian 116044, China

\*Corresponding author:

Lin Hou, College of Life Sciences, Liaoning Normal University, No.1, Liushu South Street, Ganjingzi District, Dalian 116081, China, Tel.: +86 0411 85827082,

Email: [houlin@lnnu.edu.cn](mailto:houlin@lnnu.edu.cn) (L. Hou)

\*\*Co-Corresponding author:

Xiangyang Zou, Department of Biology, Dalian Medical University, Dalian 116044, PR China Tel.: +86 0411 86110296;

Email: [zouxiangyang@126.com](mailto:zouxiangyang@126.com) (X. Zou)

<sup>+</sup>These authors contributed equally to this work.

## Supplementary Figure Legends

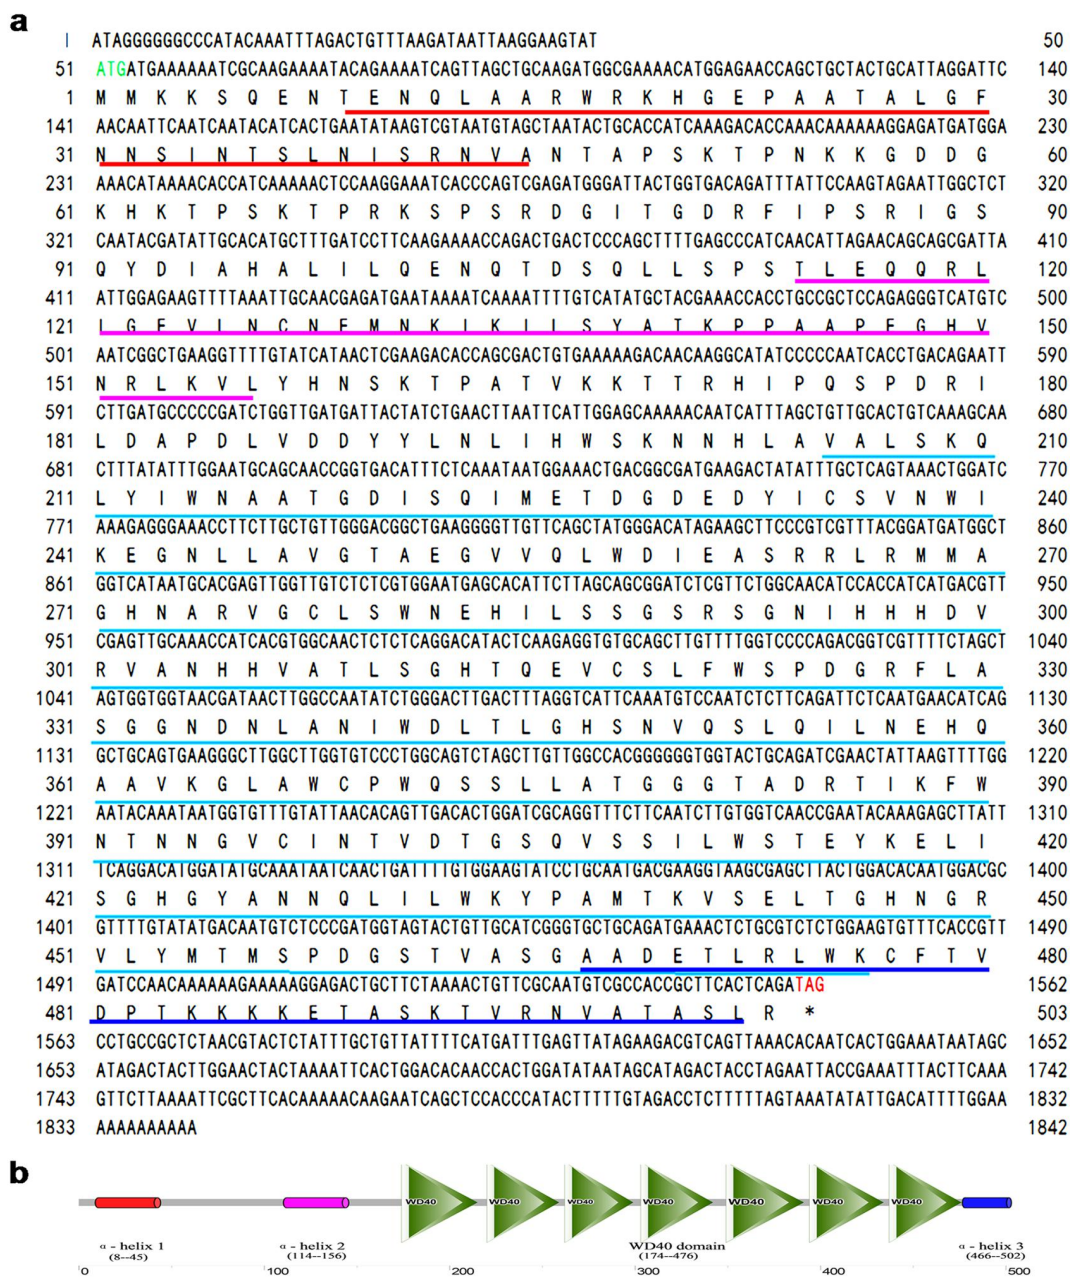

**Fig. S1 The full-length cDNA and deduced amino acid sequences of *As-cdc20* and putative protein domains. (A) Sequence analysis of the cDNA and predicted peptide sequences of *As-cdc20*. The start codon is indicated in green; the stop codon is indicated in red; a blue straight line indicates the WD40 superfamily domain. (B) Domain analysis of the putative *As-CDC20* protein, which includes  $\alpha$ -helices and seven WD40 repeats.**

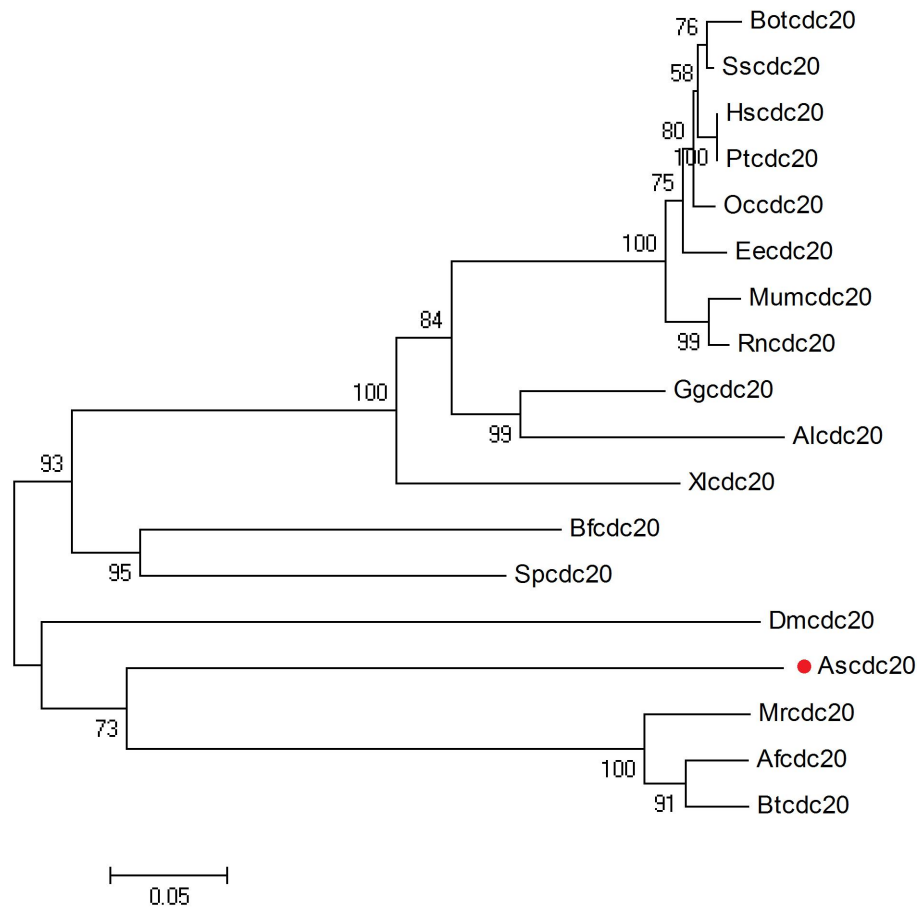

**Fig. S2 Multiple sequence alignment of *As*-CDC20 protein.** Alignment of known CDC20 sequences from 18 species. Identical amino acid residues are indicated by a black box. Less conserved residues are indicated by a gray box, whereas a pale gray box indicates somewhat similar residues. The sequence of the WD40 domain is shown in red. The sequences and their accession numbers are as follows: Alcdc20, *Alligator sinensis*, XP\_006015910.1; Ggcdc20, *Gallus gallus*, NP\_001006536.1; Afcdc20, *Apis florea*, XP\_003697924.1; Btcdc20, *Bombus terrestris*, XP\_003393065.1; Botcdc20, *Bos taurus*, NP\_001075905.1; Bfcdc20, *Branchiostoma floridae*, AAO85336.1; Dmcdc20, *Drosophila melanogaster*, AAF53523.1; Eecdc20, *Erinaceus europaeus*, XP\_007526147.1; Hscdc20, *Homo sapiens*, NP\_001246.2; Mrcdc20, *Megachile*

*rotundata*, XP\_003707890.1; Mumcdc20, *Mus musculus*, NP\_075712.2; Occdc20, *Oryctolagus cuniculus*, XP\_002715214.1; Ptcdc20, *Pan troglodytes*, JAA40139.1; Rncdc20, *Rattus norvegicus*, NP\_741990.1; Spcdc20, *Strongylocentrotus purpuratus*, XP\_781780.2; Sscdc20, *Sus scrofa*, NP\_001116566.1; Xlcdc20, *Xenopus laevis*, NP\_001081776.1; Asc dc20, *Artemia sinica*, KP162166.

Ggdc20 MAHFVFEALHGLKMLTPI.FNAFARWQRRAKESACF.....GFGFSAASMF...MKFANRSYSGK...TFSKTEK 70  
 Alcd20 ...MVCASRVGHPTVAHR.HRCF.FLEFRRAALR.....ESRSPDFGEA...YGRFAAAG...GK 57  
 Botcd20 NAQVFESLHSLQLLAPI.FNAFARWQRRAKESAG.....FAFSPMRAAN...SHSAGRTFGR.....TFGK 62  
 Ssdc20 NAQVFESLHSLQLLAPI.FNAFARWQRRAKESAG.....FAFSPMRAAN...SHSAGRTFGR.....TFGK 62  
 Hecdc20 NAQVFESLHSLQLLAPI.FNAFARWQRRAKESAG.....FAFSPMRAAN...SHSAGRTFGR.....TFGK 62  
 Fcdc20 NAQVFESLHSLQLLAPI.FNAFARWQRRAKESAG.....FAFSPMRAAN...SHSAGRTFGR.....TFGK 62  
 Ocdc20 NAQVFESLHSLQLLAPI.FNAFARWQRRAKESAG.....FAFSPMRAAN...SHSAGRTFGR.....TFGK 62  
 Ecdc20 NAQVFESLHSLQLLAPI.FNAFARWQRRAKESAG.....FAFSPMRAAN...SHSAGRTFGR.....TFGK 62  
 Mumcd20 NAQVFESLHSLQLLAPI.FNAFARWQRRAKESAG.....FAFSPMRAAN...SHSAGRTFGR.....TFGK 62  
 Rnacd20 NAQVFESLHSLQLLAPI.FNAFARWQRRAKESAG.....FAFSPMRAAN...SHSAGRTFGR.....TFGK 62  
 Xlcd20 NAQFAFETINSLKLTPI.TNAFLARWQRRAKESAG.....LNTSANTISLSEKASNR...SHSSSTFSK.....TFGK 71  
 Bfcdc20 NSHLKFMKINNTTMEETI..KGHLPRWQRRAKESAG.....LNTSANTISLSEKASNR...SHSSSTFSK.....TFGK 96  
 Spdc20 NSHLMKFMKINNTTMEETI..KGHLPRWQRRAKESAG.....LNTSANTISLSEKASNR...SHSSSTFSK.....TFGK 89  
 Dmcd20 NSQTFMVDLGNLIMGETI..RGAHPRWQRRAKESAG.....LNTSANTISLSEKASNR...SHSSSTFSK.....TFGK 73  
 Afcdc20 NSHLKFMKINNTTMEETI..KGHLPRWQRRAKESAG.....LNTSANTISLSEKASNR...SHSSSTFSK.....TFGK 75  
 Btcd20 NSHLKFMKINNTTMEETI..KGHLPRWQRRAKESAG.....LNTSANTISLSEKASNR...SHSSSTFSK.....TFGK 77  
 Mrcdc20 NSHLKFMKINNTTMEETI..KGHLPRWQRRAKESAG.....LNTSANTISLSEKASNR...SHSSSTFSK.....TFGK 77  
 Ascdc20 MKKSCENTENCAARWRHGEAATALGNINNTSLN.....ISRNVAITAENKFR..KGDGRHTEK.....TFGK 71  
 Consensus .....K

Ggdc20 GSS..RVG...STTRKAGDRVIR..FTMQEMANLITKE..NDSE.....NSTI.....KREKAWALNNGFVEEAMVRLSGFPGN 146  
 Alcd20 SAS..RTG...STFRAGDRVIR..DRAMQEVANLITKE..NDSE.....DTHI.....KREKAWALNNGFVEEAMVRLSGFPGN 133  
 Botcd20 SSS..KIQ...TTFSPGDRVIR..DRASQMEVASLSEK..NQENS.....ETFI.....KREKAWALNNGFVEEAMVRLSGFPGN 139  
 Ssdc20 SNS..KMG...TTFSPGDRVIR..DRASQMEVASLSEK..NQENS.....QTFI.....KREKAWALNNGFVEEAMVRLSGFPGN 139  
 Hsdc20 SSS..RVG...TTFSPGDRVIR..DRASQMEVASLSEK..NQENS.....QTFI.....KREKAWALNNGFVEEAMVRLSGFPGN 139  
 Fcdc20 SSS..RVG...TTFSPGDRVIR..DRASQMEVASLSEK..NQENS.....QTFI.....KREKAWALNNGFVEEAMVRLSGFPGN 139  
 Ocdc20 SNS..KQG...TTFSPGDRVIR..DRASQMEVASLSEK..NQENS.....QTFI.....KREKAWALNNGFVEEAMVRLSGFPGN 139  
 Ecdc20 GTS..RVG...TTFSPGDRVIR..DRASQMEVASLSEK..NQENS.....ETFI.....KREKAWALNNGFVEEAMVRLSGFPGN 139  
 Mumcd20 SSS..RVG...TTFSPGDRVIR..DRASQMEVASLSEK..NQEDR.....GTFI.....KREKAWALNNGFVEEAMVRLSGFPGN 139  
 Rnacd20 SNS..RVG...TTFSPGDRVIR..DRASQMEVASLSEK..NQEDG.....GTFI.....KREKAWALNNGFVEEAMVRLSGFPGN 139  
 Xlcd20 SGF..KMG...GTFSPGDRVIR..DRASQMEVASLSEK..NEEVD.....TSET.....KREKAWALNNGFVEEAMVRLSGFPGN 147  
 Bfcdc20 SKTFPGNAK...TF..KTFVDRGIR..DRASQMEVASLSEK..NEEVD.....MLSPS.....KREKAWALNNGFVEEAMVRLSGFPGN 175  
 Spdc20 ...GSK...TFTRFPGDRVIR..DRASQMEVASLSEK..NEEVD.....MLSPS.....KREKAWALNNGFVEEAMVRLSGFPGN 161  
 Dmcd20 KSNITFS...KTFGGDRVIR..DRASQMEVASLSEK..NEEVD.....MLSPS.....KREKAWALNNGFVEEAMVRLSGFPGN 66  
 Afcdc20 TSKKSPSTISALTFSPGDRVIR..DRASQMEVASLSEK..NEEVD.....MLSPS.....KREKAWALNNGFVEEAMVRLSGFPGN 164  
 Btcd20 TSKKSPSTISALTFSPGDRVIR..DRASQMEVASLSEK..NEEVD.....MLSPS.....KREKAWALNNGFVEEAMVRLSGFPGN 165  
 Mrcdc20 GSKKSPSTISALTFSPGDRVIR..DRASQMEVASLSEK..NEEVD.....MLSPS.....KREKAWALNNGFVEEAMVRLSGFPGN 164  
 Ascdc20 S.....PSRDGITDRVIR..DRASQMEVASLSEK..NEEVD.....MLSPS.....KREKAWALNNGFVEEAMVRLSGFPGN 144  
 Consensus dr ip r q 1

Ggdc20 FEVGNLRKLVDSQRTFSSRTKIG..IESLPRDLDAPIRDYINLINSQNALVAADNSYVHNSGGLLQLLQMECPGYSVAWVTEG 246  
 Alcd20 FEVGNLRKLVDSQRTFSSRTKIG..IESLPRDLDAPIRDYINLINSQNALVAADNSYVHNSGGLLQLLQMECPGYSVAWVTEG 233  
 Botcd20 FEVGNLRKLVDSQRTFSSRTKIG..IESLPRDLDAPIRDYINLINSQNALVAADNSYVHNSGGLLQLLQMECPGYSVAWVTEG 239  
 Ssdc20 FEVGNLRKLVDSQRTFSSRTKIG..IESLPRDLDAPIRDYINLINSQNALVAADNSYVHNSGGLLQLLQMECPGYSVAWVTEG 239  
 Hecdc20 FEVGNLRKLVDSQRTFSSRTKIG..IESLPRDLDAPIRDYINLINSQNALVAADNSYVHNSGGLLQLLQMECPGYSVAWVTEG 239  
 Fcdc20 FEVGNLRKLVDSQRTFSSRTKIG..IESLPRDLDAPIRDYINLINSQNALVAADNSYVHNSGGLLQLLQMECPGYSVAWVTEG 239  
 Ocdc20 FEVGNLRKLVDSQRTFSSRTKIG..IESLPRDLDAPIRDYINLINSQNALVAADNSYVHNSGGLLQLLQMECPGYSVAWVTEG 239  
 Ecdc20 FEVGNLRKLVDSQRTFSSRTKIG..IESLPRDLDAPIRDYINLINSQNALVAADNSYVHNSGGLLQLLQMECPGYSVAWVTEG 239  
 Mumcd20 FEVGNLRKLVDSQRTFSSRTKIG..IESLPRDLDAPIRDYINLINSQNALVAADNSYVHNSGGLLQLLQMECPGYSVAWVTEG 239  
 Rnacd20 FEVGNLRKLVDSQRTFSSRTKIG..IESLPRDLDAPIRDYINLINSQNALVAADNSYVHNSGGLLQLLQMECPGYSVAWVTEG 239  
 Xlcd20 FEVGNLRKLVDSQRTFSSRTKIG..IESLPRDLDAPIRDYINLINSQNALVAADNSYVHNSGGLLQLLQMECPGYSVAWVTEG 247  
 Bfcdc20 FEVGNLRKLVDSQRTFSSRTKIG..IESLPRDLDAPIRDYINLINSQNALVAADNSYVHNSGGLLQLLQMECPGYSVAWVTEG 275  
 Spdc20 FEVGNLRKLVDSQRTFSSRTKIG..IESLPRDLDAPIRDYINLINSQNALVAADNSYVHNSGGLLQLLQMECPGYSVAWVTEG 261  
 Dmcd20 FEVGNLRKLVDSQRTFSSRTKIG..IESLPRDLDAPIRDYINLINSQNALVAADNSYVHNSGGLLQLLQMECPGYSVAWVTEG 264  
 Afcdc20 FEVGNLRKLVDSQRTFSSRTKIG..IESLPRDLDAPIRDYINLINSQNALVAADNSYVHNSGGLLQLLQMECPGYSVAWVTEG 262  
 Btcd20 FEVGNLRKLVDSQRTFSSRTKIG..IESLPRDLDAPIRDYINLINSQNALVAADNSYVHNSGGLLQLLQMECPGYSVAWVTEG 264  
 Mrcdc20 FEVGNLRKLVDSQRTFSSRTKIG..IESLPRDLDAPIRDYINLINSQNALVAADNSYVHNSGGLLQLLQMECPGYSVAWVTEG 263  
 Ascdc20 FEVGNLRKLVDSQRTFSSRTKIG..IESLPRDLDAPIRDYINLINSQNALVAADNSYVHNSGGLLQLLQMECPGYSVAWVTEG 244  
 Consensus pe n y tp r ip ldap dyyinl ws n aval y w g i y wi eq

Ggdc20 LAAGSNAEVLWDVQQRFRNMTSSSRVGSLENNYVILSGRGGCHHBDVRAEHVATISEGVEVCHRAADHGLASGNDNLVWVBSA 346  
 Alcd20 LAAGSNAEVLWDVQQRFRNMTSSSRVGSLENNYVILSGRGGCHHBDVRAEHVATISEGVEVCHRAADHGLASGNDNLVWVBSA 333  
 Botcd20 LAAGSNAEVLWDVQQRFRNMTSSSRVGSLENNYVILSGRGGCHHBDVRAEHVATISEGVEVCHRAADHGLASGNDNLVWVBSA 339  
 Ssdc20 LAAGSNAEVLWDVQQRFRNMTSSSRVGSLENNYVILSGRGGCHHBDVRAEHVATISEGVEVCHRAADHGLASGNDNLVWVBSA 339  
 Hecdc20 LAAGSNAEVLWDVQQRFRNMTSSSRVGSLENNYVILSGRGGCHHBDVRAEHVATISEGVEVCHRAADHGLASGNDNLVWVBSA 339  
 Fcdc20 LAAGSNAEVLWDVQQRFRNMTSSSRVGSLENNYVILSGRGGCHHBDVRAEHVATISEGVEVCHRAADHGLASGNDNLVWVBSA 339  
 Ocdc20 LAAGSNAEVLWDVQQRFRNMTSSSRVGSLENNYVILSGRGGCHHBDVRAEHVATISEGVEVCHRAADHGLASGNDNLVWVBSA 339  
 Ecdc20 LAAGSNAEVLWDVQQRFRNMTSSSRVGSLENNYVILSGRGGCHHBDVRAEHVATISEGVEVCHRAADHGLASGNDNLVWVBSA 339  
 Mumcd20 LAAGSNAEVLWDVQQRFRNMTSSSRVGSLENNYVILSGRGGCHHBDVRAEHVATISEGVEVCHRAADHGLASGNDNLVWVBSA 339  
 Rnacd20 LAAGSNAEVLWDVQQRFRNMTSSSRVGSLENNYVILSGRGGCHHBDVRAEHVATISEGVEVCHRAADHGLASGNDNLVWVBSA 339  
 Xlcd20 LAAGSNAEVLWDVQQRFRNMTSSSRVGSLENNYVILSGRGGCHHBDVRAEHVATISEGVEVCHRAADHGLASGNDNLVWVBSA 347  
 Bfcdc20 LAAGSNAEVLWDVQQRFRNMTSSSRVGSLENNYVILSGRGGCHHBDVRAEHVATISEGVEVCHRAADHGLASGNDNLVWVBSA 375  
 Spdc20 LAAGSNAEVLWDVQQRFRNMTSSSRVGSLENNYVILSGRGGCHHBDVRAEHVATISEGVEVCHRAADHGLASGNDNLVWVBSA 361  
 Dmcd20 LAAGSNAEVLWDVQQRFRNMTSSSRVGSLENNYVILSGRGGCHHBDVRAEHVATISEGVEVCHRAADHGLASGNDNLVWVBSA 364  
 Afcdc20 LAAGSNAEVLWDVQQRFRNMTSSSRVGSLENNYVILSGRGGCHHBDVRAEHVATISEGVEVCHRAADHGLASGNDNLVWVBSA 362  
 Btcd20 LAAGSNAEVLWDVQQRFRNMTSSSRVGSLENNYVILSGRGGCHHBDVRAEHVATISEGVEVCHRAADHGLASGNDNLVWVBSA 364  
 Mrcdc20 LAAGSNAEVLWDVQQRFRNMTSSSRVGSLENNYVILSGRGGCHHBDVRAEHVATISEGVEVCHRAADHGLASGNDNLVWVBSA 363  
 Ascdc20 LAAGSNAEVLWDVQQRFRNMTSSSRVGSLENNYVILSGRGGCHHBDVRAEHVATISEGVEVCHRAADHGLASGNDNLVWVBSA 344  
 Consensus la g lwd r z m zv l wn sg r g i hbdvz t h qevc l w d laag ndn w

Ggdc20 RSDSG.FTHVQITFTHCAGAVAVWCFWQSNLHGGGTDRHIFHWVCSGACLSAFAFSQVSIILSPHRELISHGAGNCLVWRYPMARUI 445  
 Alcd20 RSDSG.FTHVQITFTHCAGAVAVWCFWQSNLHGGGTDRHIFHWVCSGACLSAFAFSQVSIILSPHRELISHGAGNCLVWRYPMARUI 432  
 Botcd20 FEGG..WVFLQITFTHCAGAVAVWCFWQSNLHGGGTDRHIFHWVCSGACLSAFAFSQVSIILSPHRELISHGAGNCLVWRYPMARUI 437  
 Ssdc20 FEGG..WVFLQITFTHCAGAVAVWCFWQSNLHGGGTDRHIFHWVCSGACLSAFAFSQVSIILSPHRELISHGAGNCLVWRYPMARUI 437  
 Hecdc20 FEGG..WVFLQITFTHCAGAVAVWCFWQSNLHGGGTDRHIFHWVCSGACLSAFAFSQVSIILSPHRELISHGAGNCLVWRYPMARUI 437  
 Fcdc20 FEGG..WVFLQITFTHCAGAVAVWCFWQSNLHGGGTDRHIFHWVCSGACLSAFAFSQVSIILSPHRELISHGAGNCLVWRYPMARUI 437  
 Ocdc20 FEGG..WVFLQITFTHCAGAVAVWCFWQSNLHGGGTDRHIFHWVCSGACLSAFAFSQVSIILSPHRELISHGAGNCLVWRYPMARUI 437  
 Ecdc20 FEGG..WVFLQITFTHCAGAVAVWCFWQSNLHGGGTDRHIFHWVCSGACLSAFAFSQVSIILSPHRELISHGAGNCLVWRYPMARUI 437  
 Mumcd20 FEGG..WVFLQITFTHCAGAVAVWCFWQSNLHGGGTDRHIFHWVCSGACLSAFAFSQVSIILSPHRELISHGAGNCLVWRYPMARUI 437  
 Rnacd20 FEGG..WVFLQITFTHCAGAVAVWCFWQSNLHGGGTDRHIFHWVCSGACLSAFAFSQVSIILSPHRELISHGAGNCLVWRYPMARUI 437  
 Xlcd20 RSDSG.FTHVQITFTHCAGAVAVWCFWQSNLHGGGTDRHIFHWVCSGACLSAFAFSQVSIILSPHRELISHGAGNCLVWRYPMARUI 446  
 Bfcdc20 FREG..NVVLSITFHQAVAVLWCFWQSNLHGGGTDRHIFHWVCSGACLSAFAFSQVSIILSPHRELISHGAGNCLVWRYPMARUI 473  
 Spdc20 FREG..NVVLSITFHQAVAVLWCFWQSNLHGGGTDRHIFHWVCSGACLSAFAFSQVSIILSPHRELISHGAGNCLVWRYPMARUI 459  
 Dmcd20 SGVGTATIDHKNENHQAVALWCFWQSNLHGGGTDRHIFHWVCSGACLSAFAFSQVSIILSPHRELISHGAGNCLVWRYPMARUI 464  
 Afcdc20 SVCSHTNITCIYSLNHQAVALWCFWQSNLHGGGTDRHIFHWVCSGACLSAFAFSQVSIILSPHRELISHGAGNCLVWRYPMARUI 462  
 Btcd20 SVCSHTNITCIYSLNHQAVALWCFWQSNLHGGGTDRHIFHWVCSGACLSAFAFSQVSIILSPHRELISHGAGNCLVWRYPMARUI 464  
 Mrcdc20 SVCSHTNITCIYSLNHQAVALWCFWQSNLHGGGTDRHIFHWVCSGACLSAFAFSQVSIILSPHRELISHGAGNCLVWRYPMARUI 463  
 Ascdc20 RSHN.VGSLQIRNHQAVALWCFWQSNLHGGGTDRHIFHWVCSGACLSAFAFSQVSIILSPHRELISHGAGNCLVWRYPMARUI 442  
 Consensus hq av wcpwq la gggd di wn g d sqv s ke s ng a nql wky p m

Ggdc20 IIRGHTARLNDMSPDGTVNSAETELRLMCPHDFIRKREKAKASAR..SS.IIHGG 506  
 Alcd20 IIRGHTARLNDMSPDGTVNSAETELRLMCPHDFIRKREKAKASAR..SS.IIHGG 493  
 Botcd20 IIRGHTARLNDMSPDGTVNSAETELRLMCPHDFIRKREKAKASAR..SS.IIHGG 498  
 Ssdc20 IIRGHTARLNDMSPDGTVNSAETELRLMCPHDFIRKREKAKASAR..SS.IIHGG 498  
 Hecdc20 IIRGHTARLNDMSPDGTVNSAETELRLMCPHDFIRKREKAKASAR..SS.IIHGG 498  
 Fcdc20 IIRGHTARLNDMSPDGTVNSAETELRLMCPHDFIRKREKAKASAR..SS.IIHGG 498  
 Ocdc20 IIRGHTARLNDMSPDGTVNSAETELRLMCPHDFIRKREKAKASAR..SS.IIHGG 498  
 Ecdc20 IIRGHTARLNDMSPDGTVNSAETELRLMCPHDFIRKREKAKASAR..SS.IIHGG 499  
 Mumcd20 IIRGHTARLNDMSPDGTVNSAETELRLMCPHDFIRKREKAKASAR..SS.IIHGG 498  
 Rnacd20 IIRGHTARLNDMSPDGTVNSAETELRLMCPHDFIRKREKAKASAR..SS.IIHGG 498  
 Xlcd20 IIRGHTARLNDMSPDGTVNSAETELRLMCPHDFIRKREKAKASAR..SS.IIHGG 506  
 Bfcdc20 IIRGHTARLNDMSPDGTVNSAETELRLMCPHDFIRKREKAKASAR..SS.IIHGG 535  
 Spdc20 IIRGHTARLNDMSPDGTVNSAETELRLMCPHDFIRKREKAKASAR..SS.IIHGG 523  
 Dmcd20 IIRGHTARLNDMSPDGTVNSAETELRLMCPHDFIRKREKAKASAR..SS.IIHGG 525  
 Afcdc20 IIRGHTARLNDMSPDGTVNSAETELRLMCPHDFIRKREKAKASAR..SS.IIHGG 522  
 Btcd20 IIRGHTARLNDMSPDGTVNSAETELRLMCPHDFIRKREKAKASAR..SS.IIHGG 524  
 Mrcdc20 IIRGHTARLNDMSPDGTVNSAETELRLMCPHDFIRKREKAKASAR..SS.IIHGG 523  
 Ascdc20 IIRGHTARLNDMSPDGTVNSAETELRLMCPHDFIRKREKAKASAR..SS.IIHGG 502  
 Consensus l qh r l hspdg s aetelrlw of dp

**Fig. S3** The neighbor-joining phylogenetic analysis of *As*-CDC20 protein. The tree constructed based on the amino acid sequences of *As*-CDC20 (this study) and 17 other

species from GenBank using the sequence analysis tool MEGA 4.1. The sequences and their accession numbers refer to the legend of Supplementary Fig. S2. A red dot indicates *As*-CDC20.

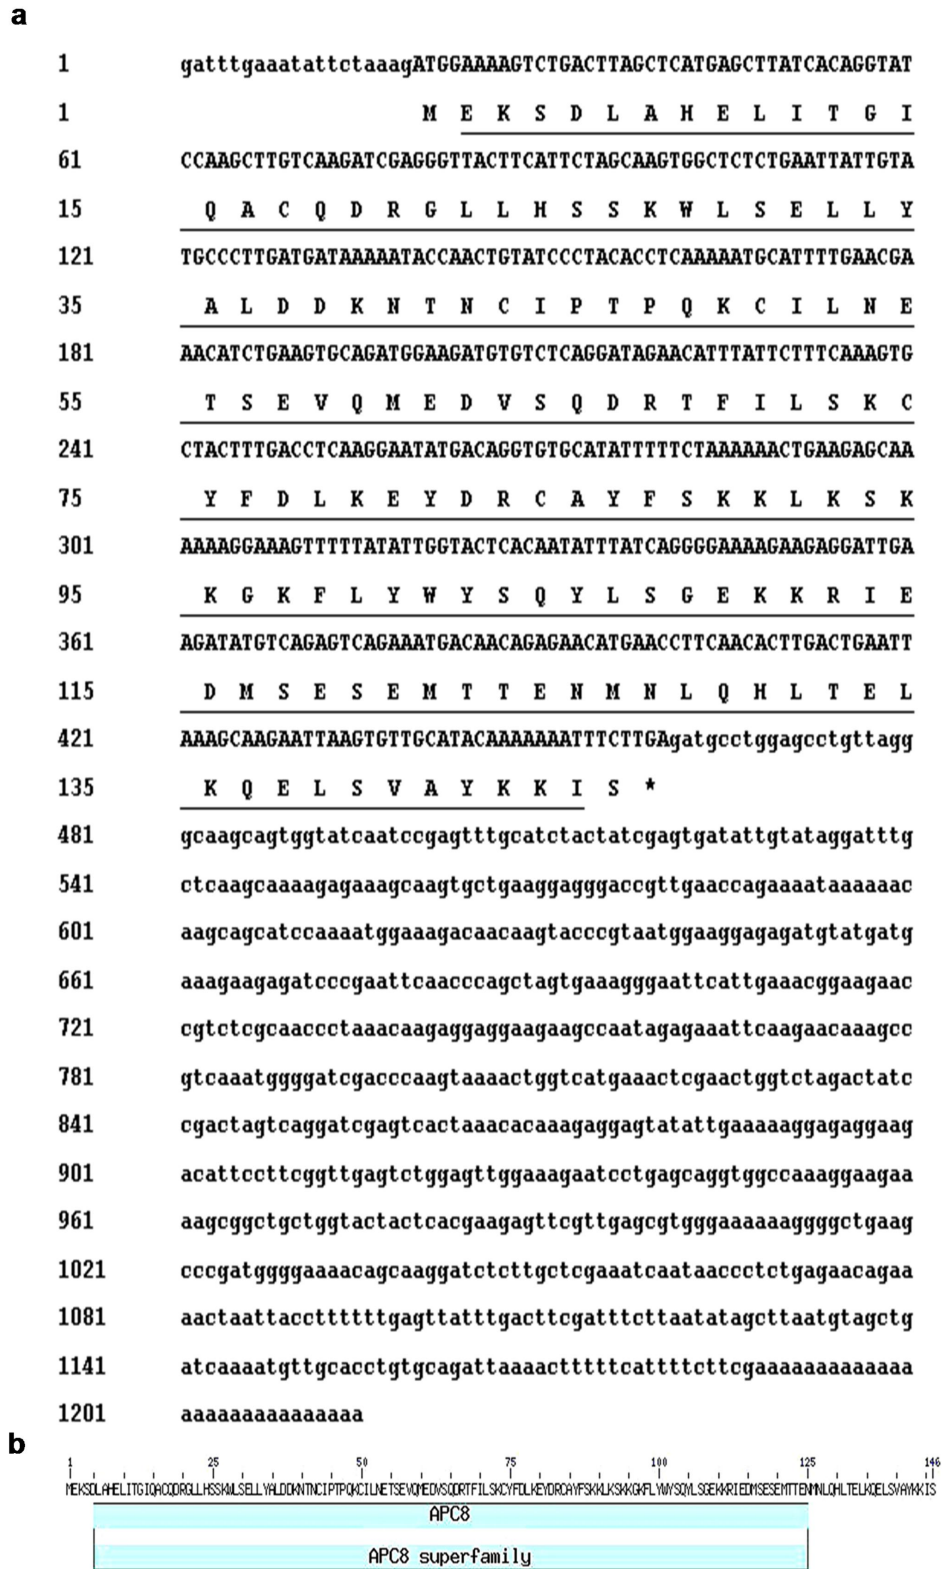

**Fig. S4** The full-length cDNA and deduced amino acid sequences of *As-cdc23* and putative protein domains. (A) Sequence analysis of the cDNA and predicted peptide

sequences of *As-cdc23*. A black straight line indicates the ORF region. **(B)** Domain analysis of the putative *As-CDC23* protein. The mature protein includes an APC8 superfamily domain in the N-terminus.

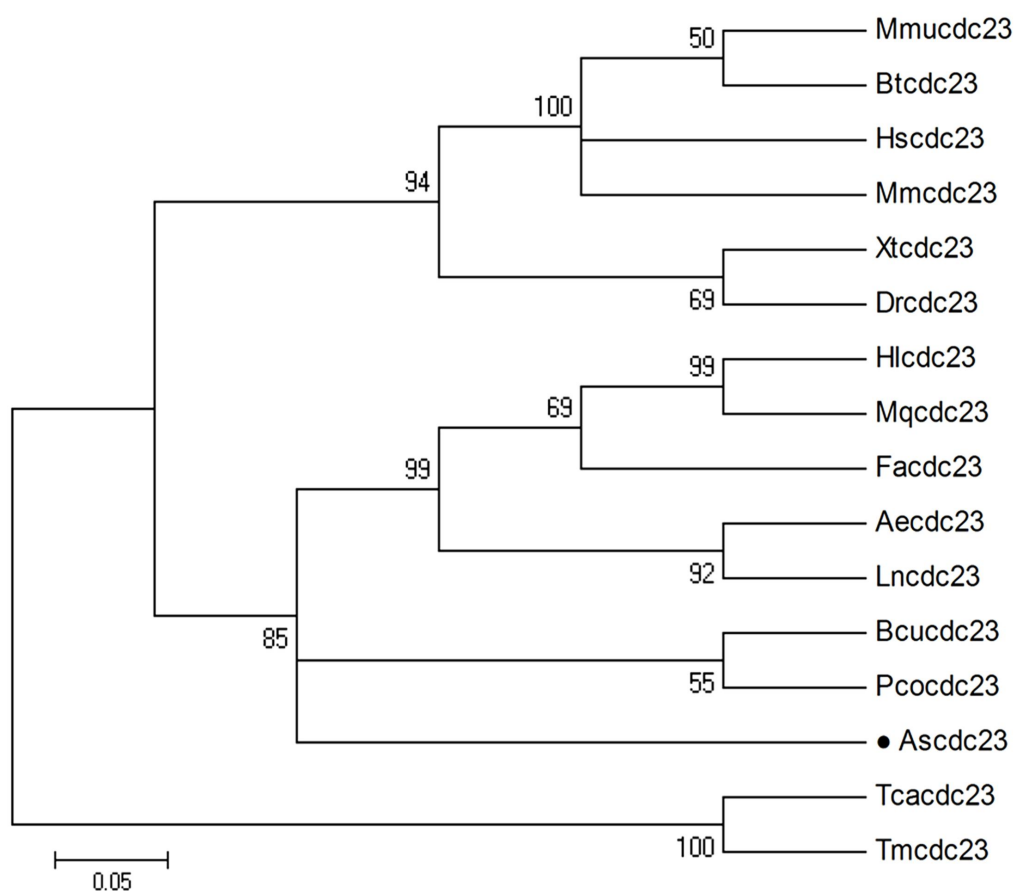

**Fig. S5 Multiple sequence alignment of *As-CDC23* protein.** Sequence alignment of known CDC23 sequences from 16 species. Identical amino acid residues are indicated by gray shading, and less conserved residues are indicated by pale gray shading. The sequence of the APC8 domain is shown in blue. The sequences and their accession numbers are as follows: Mmucdc23, *Mus musculus*, NP\_848124.1; Btcdc23, *Bos taurus*, NP\_001073735.1; Hscdc23, *Homo sapiens*, NP\_004652.2; Mmcdc23, *Macaca mulatta*,



NP\_001244486.1; Xtcdc23, *Xenopus tropicalis*, NP\_001016759.1; Drcdc23, *Danio rerio*, NP\_957227.1; Hlcdc23, *Habropoda laboriosa*, KOC68110.1; Mqcdc23, *Melipona quadrifasciata*, KOX74256.1; Facdc23, *Fopius arisanus*, JAG81156.1; Aecdc23, *Acromyrmex echinator*, EGI60542.1; Lncdc23, *Lasius niger*, KMQ88026.1; Bcucdc23, *Bactrocera cucurbitae*, JAC97421.1; Pcocdc23, *Pediculus corporis*, XP\_002426290.1; Teacdc23, *Toxocara canis*, KHN78208.1; Tmcdc23, *Trichinella murrelli*, KRX39430.1; Ascsc23, *Artemia sinica*, KU986660.

|           |                                                                                                                                                                                        |     |
|-----------|----------------------------------------------------------------------------------------------------------------------------------------------------------------------------------------|-----|
| Aecdc23   | .....VE.....KELLAHEITGQAGCQDGLHSSWLS...EELVNDKXNICTPTQKGLMETSVEQMEDVSQD.....RT...EELSKYFLENERC...YESSKLLKSKG                                                                           | 96  |
| Aecdc23   | .....MDES.....KFMN...EVSDI...HAIREGSCQGLLHTTWLA...EHSYKRVNVDIDDLTIHAK...VPEVSEAEI.....VTLAKYFVLENYDRAAVYVINDVYSPRI                                                                     | 93  |
| Bouc23    | .....MEEDLFN.....IPL...FVWRERRRGIVECQPRGLIGSARWLA...EMHGLSEVECDG...DVNRCQNFISINEGGQFLGIGSQAEYDN...MELAKSYFVLENYDRAAVYVINDVYSPRI                                                        | 109 |
| Drcdc23   | .....NAATR.....CSDFGDL...QIRKQISITACQRRERGLVHSRWLA...EAFSLDPLFNEIPPPP...LTERDAQDLDA...LCLAKSYFVLENYDRAAVYVINDVYSPRI                                                                    | 97  |
| Facdc23   | .....MEVSM.....KFDI...EVMIDTLRAITEGSCQGLLHTTWLA...EHSYKRVNVDIDDLTIHAK...VPEVSEAEI.....VTLAKYFVLENYDRAAVYVINDVYSPRI                                                                     | 95  |
| Hlcdc23   | .....MEEFV.....KFDI...EVMIDTLRAITEGSCQGLLHTTWLA...EHSYKRVNVDIDDLTIHAK...VPEVSEAEI.....VTLAKYFVLENYDRAAVYVINDVYSPRI                                                                     | 95  |
| Lncdc23   | .....MDES.....KFMN...EVSDI...HAIREGSCQGLLHTTWLA...EHSYKRVNVDIDDLTIHAK...VPEVSEAEI.....VTLAKYFVLENYDRAAVYVINDVYSPRI                                                                     | 93  |
| Mqcdc23   | .....MDES.....KFMN...EVSDI...HAIREGSCQGLLHTTWLA...EHSYKRVNVDIDDLTIHAK...VPEVSEAEI.....VTLAKYFVLENYDRAAVYVINDVYSPRI                                                                     | 93  |
| Xtcdc23   | .....NARAT.....SGMPSDL...EIRKQISITACQRRERGLVHSRWLA...EAFSLDPLFNEIPPPP...LTERDAQDLDA...LCLAKSYFVLENYDRAAVYVINDVYSPRI                                                                    | 96  |
| Pocdc23   | MFDQNNKQDDEEN.....KIKIKKDESAI...KCLNRLIHTANWLS...EAFSLDPLFNEIPPPP...LTERDAQDLDA...LCLAKSYFVLENYDRAAVYVINDVYSPRI                                                                        | 99  |
| Mmucdc23  | .....NAASTSVVAVVAVAVLSTNSDFSL...EIRKQISITACQRRERGLVHSRWLA...EAFSLDPLFNEIPPPP...LTERDAQDLDA...LCLAKSYFVLENYDRAAVYVINDVYSPRI                                                             | 114 |
| Toacdc23  | .....FLQRSLEKPNNSVWTLIGHEFMEQKNSAACLAY...KAVQSDFNDRVGYGL...CYLDILKMSYS...VYVQQAHCCKSDDSRMLVALG...VYTRLNRVSDAQKCLLKA...FVGVDE...TALMLL...GKLFK...GEGDQA...AVVE                          | 139 |
| Tmcdc23   | .....TAYANILMSVERSN.....ESLAAIAYESH...TNAFSDIEMVYGIYS...LYNDIQSK...ALHYRH...LANNSDSQA...WMLGHSI...QLMENS...V...AMFAYERA...E...RDPFF...V...ALY...IG...L...Y...Q...E...H...K...V...D...F | 121 |
| Bcucdc23  | .....NAASTSVVAVVAVAVLSTNSDFSL...EIRKQISITACQRRERGLVHSRWLA...EAFSLDPLFNEIPPPP...LTERDAQDLDA...LCLAKSYFVLENYDRAAVYVINDVYSPRI                                                             | 114 |
| Mmcdc23   | .....NAASTSVVAVVAVAVLSTNSDFSL...EIRKQISITACQRRERGLVHSRWLA...EAFSLDPLFNEIPPPP...LTERDAQDLDA...LCLAKSYFVLENYDRAAVYVINDVYSPRI                                                             | 114 |
| Hscdc23   | .....NAASTSVVAVVAVAVLSTNSDFSL...EIRKQISITACQRRERGLVHSRWLA...EAFSLDPLFNEIPPPP...LTERDAQDLDA...LCLAKSYFVLENYDRAAVYVINDVYSPRI                                                             | 114 |
| Consensus | .....NAASTSVVAVVAVAVLSTNSDFSL...EIRKQISITACQRRERGLVHSRWLA...EAFSLDPLFNEIPPPP...LTERDAQDLDA...LCLAKSYFVLENYDRAAVYVINDVYSPRI                                                             | 114 |
| Aecdc23   | YELIYMSRY...LSGKRRK...I...E...D...M...S...E...M...T...E...M...N...L...Q...H...E...K...Q...E...S...V...A...Y...K...K...I...S                                                            | 146 |
| Aecdc23   | YELIYMSRY...LSGKRRK...I...D...M...T...D...V...P...P...M...K...R...N...E...T...K...Y...C...A...D...R...S...D...H...L...A...S...K                                                        | 141 |
| Bouc23    | YELIYMSRY...LSGKRRK...I...D...S...T...D...R...S...N...L...N...D...Y...G...H...V...R...L...M...E...L...L...A...V...R...S...E...Y...S...H...G                                            | 159 |
| Drcdc23   | YELIYMSRY...LSGKRRK...I...D...E...T...V...D...S...L...G...F...L...E...G...Q...V...R...N...E...A...R...R...E...R...V...E...L...S...R...K...H...S...A...G...E                            | 149 |
| Facdc23   | YELIYMSRY...LSGKRRK...I...D...M...T...D...V...P...P...M...K...R...N...E...T...K...Y...C...A...D...R...S...D...H...L...A...S...K                                                        | 143 |
| Hlcdc23   | YELIYMSRY...LSGKRRK...I...D...M...T...D...V...P...P...M...K...R...N...E...T...K...Y...C...A...D...R...S...D...H...L...A...S...K                                                        | 143 |
| Lncdc23   | YELIYMSRY...LSGKRRK...I...D...M...T...D...V...P...P...M...K...R...N...E...T...K...Y...C...A...D...R...S...D...H...L...A...S...K                                                        | 141 |
| Mqcdc23   | YELIYMSRY...LSGKRRK...I...D...M...T...D...V...P...P...M...K...R...N...E...T...K...Y...C...A...D...R...S...D...H...L...A...S...K                                                        | 143 |
| Xtcdc23   | YELIYMSRY...LSGKRRK...I...D...M...T...D...V...P...P...M...K...R...N...E...T...K...Y...C...A...D...R...S...D...H...L...A...S...K                                                        | 148 |
| Pocdc23   | YELIYMSRY...LSGKRRK...I...V...E...D...M...T...E...Q...T...C...L...L...D...S...Q...T...A...V...I...N...S...Q...N...E...L...A...K...E...R...T...O...N...S                                | 150 |
| Mmucdc23  | YELIYMSRY...LSGKRRK...I...D...M...T...D...V...P...P...M...K...R...N...E...T...K...Y...C...A...D...R...S...D...H...L...A...S...K                                                        | 166 |
| Toacdc23  | YELIYMSRY...LSGKRRK...I...D...M...T...D...V...P...P...M...K...R...N...E...T...K...Y...C...A...D...R...S...D...H...L...A...S...K                                                        | 203 |
| Tmcdc23   | YELIYMSRY...LSGKRRK...I...D...M...T...D...V...P...P...M...K...R...N...E...T...K...Y...C...A...D...R...S...D...H...L...A...S...K                                                        | 185 |
| Bcucdc23  | YELIYMSRY...LSGKRRK...I...D...M...T...D...V...P...P...M...K...R...N...E...T...K...Y...C...A...D...R...S...D...H...L...A...S...K                                                        | 166 |
| Mmcdc23   | YELIYMSRY...LSGKRRK...I...D...M...T...D...V...P...P...M...K...R...N...E...T...K...Y...C...A...D...R...S...D...H...L...A...S...K                                                        | 166 |
| Hscdc23   | YELIYMSRY...LSGKRRK...I...D...M...T...D...V...P...P...M...K...R...N...E...T...K...Y...C...A...D...R...S...D...H...L...A...S...K                                                        | 166 |
| Consensus | YELIYMSRY...LSGKRRK...I...D...M...T...D...V...P...P...M...K...R...N...E...T...K...Y...C...A...D...R...S...D...H...L...A...S...K                                                        | 166 |

**Fig. S6** The neighbor-joining phylogenetic analysis of *As*-CDC23 protein. The tree constructed by the neighbor-joining method, based on the amino acid sequences of *As*-CDC23 and 15 other species from GenBank using the sequence analysis tool MEGA 4.1. The sequences and their accession numbers are shown in Supplementary Fig S5. A black dot (●) indicates *As*-CDC23.

## **Equipment and settings**

**Fig.S1 and Fig.S4:** We used DNAMAN to display the sequences, and using ORF Finder; the prosite tools of ExPASy and SMART predict the protein structural and functional domains.

**Fig.S2 and Fig.S5:** MEGA4.1 software and ClustalX2.0 were used to construct a phylogenetic tree of the two proteins from different species using the neighbor-joining (NJ) method.

**Fig.S3 and Fig.S6:** Multiple sequence alignments were performed for the amino acid sequences of *As*-CDC20 and *As*-CDC23 with similar proteins from other species, using the ClustalX2.0 and DNAMAN.

**Supplementary Figure 7:** The full-length gels of *As*-CDC20 protein.

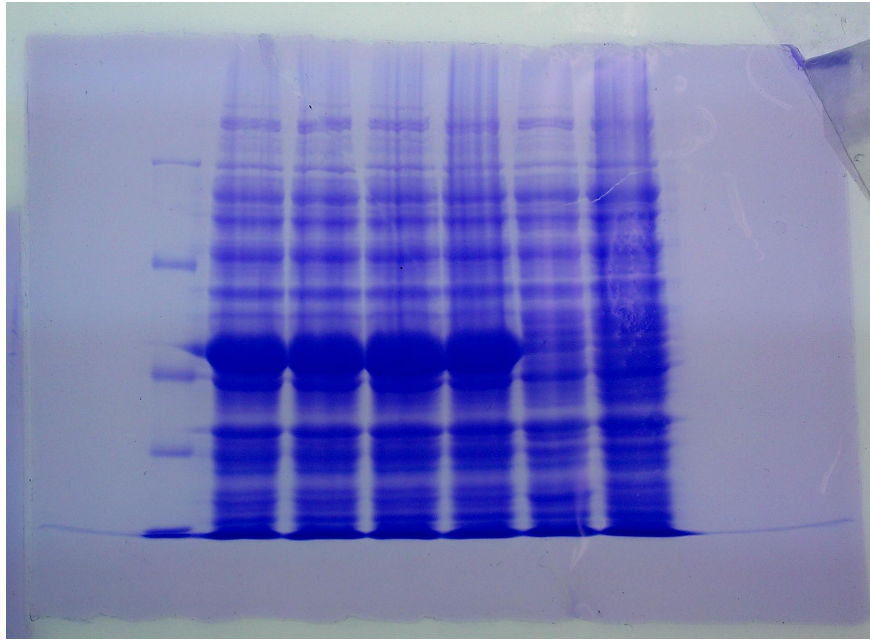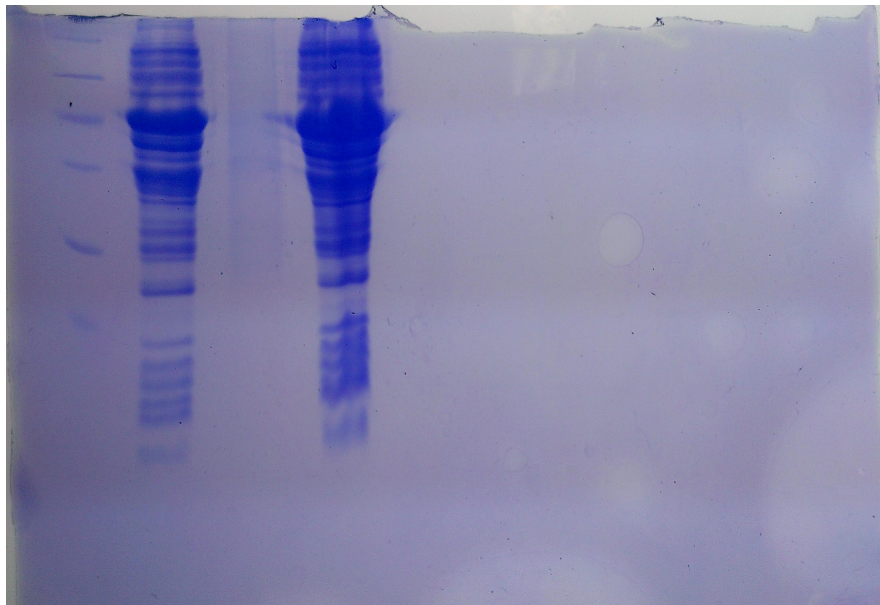

**Supplementary Figure 8:** The full-length gels of *As*-CDC23 protein.

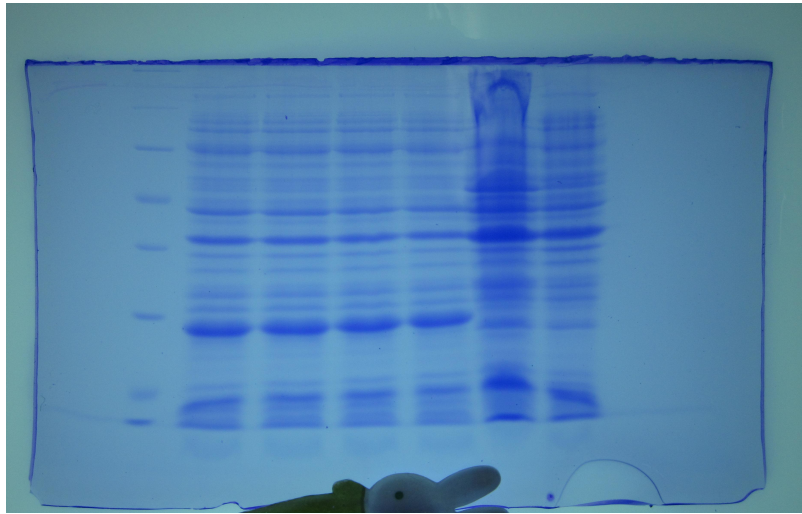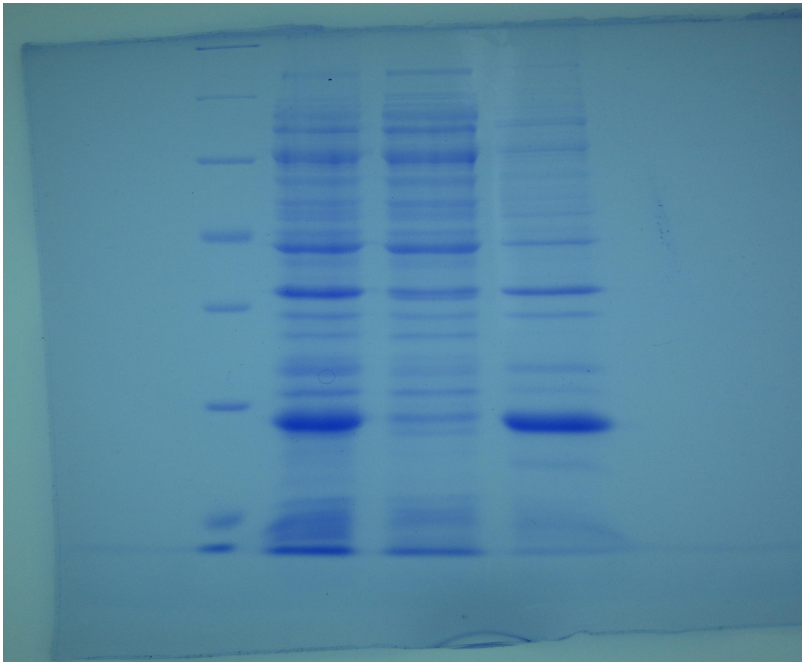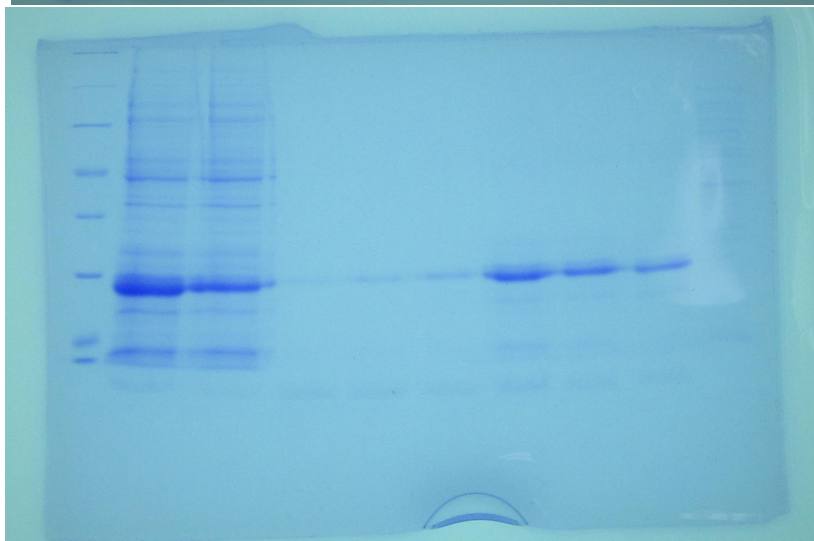

**Supplementary Figure 9:** The full-length blots of western blotting analysis.

**GAPDH**

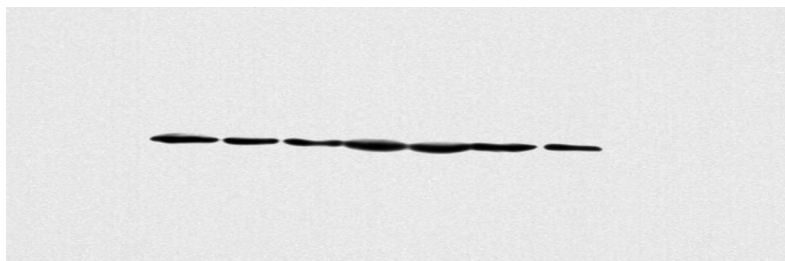

***As*-CDC20**

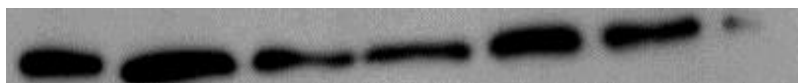

***As*-CDH1**

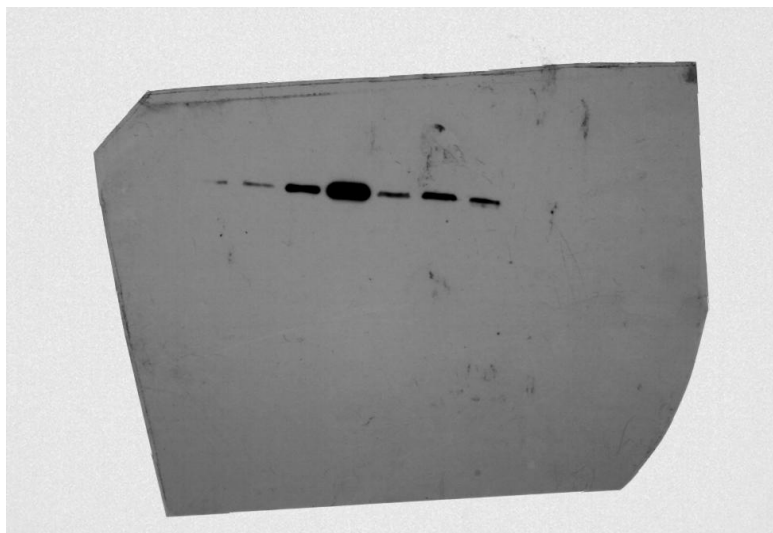

***As*-CDC23**

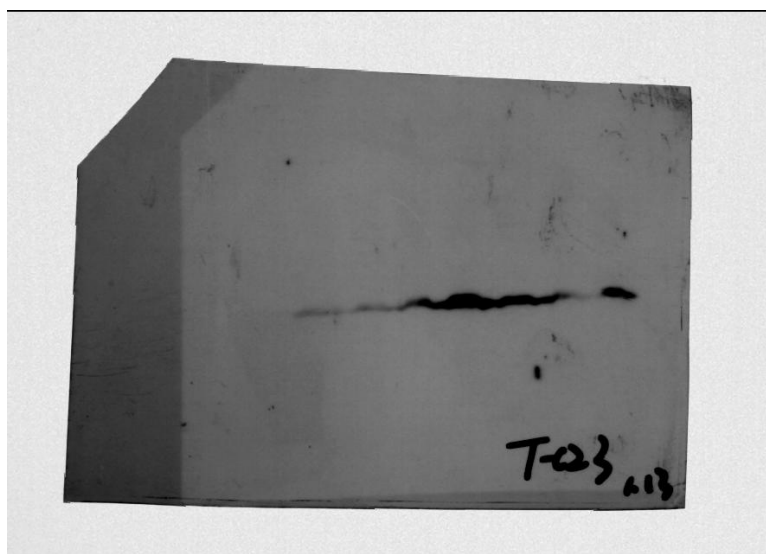

*As*-Geminin

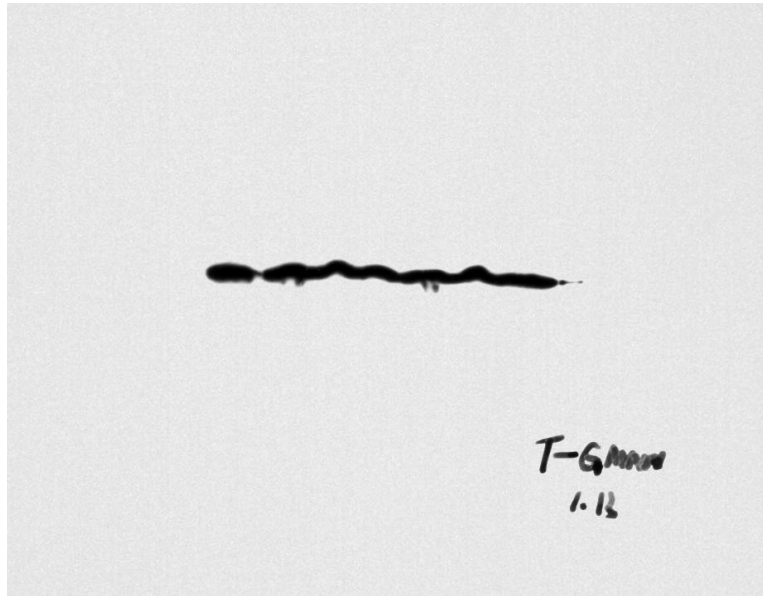

*As*-CDC14

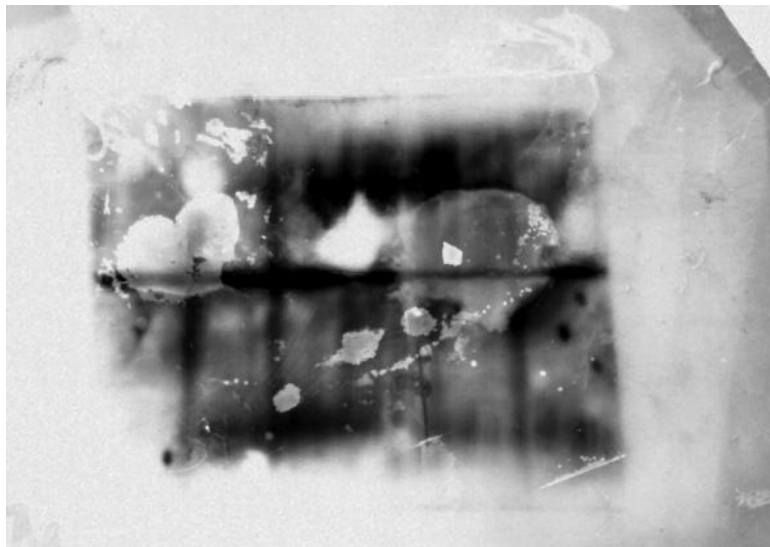

*As*-securin

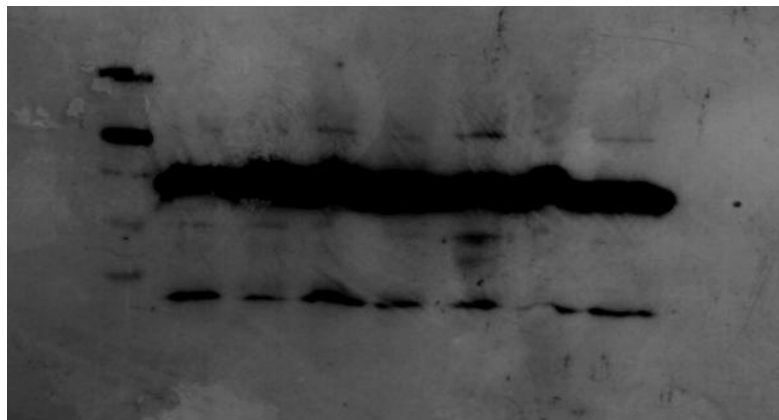

*As*-CDK1

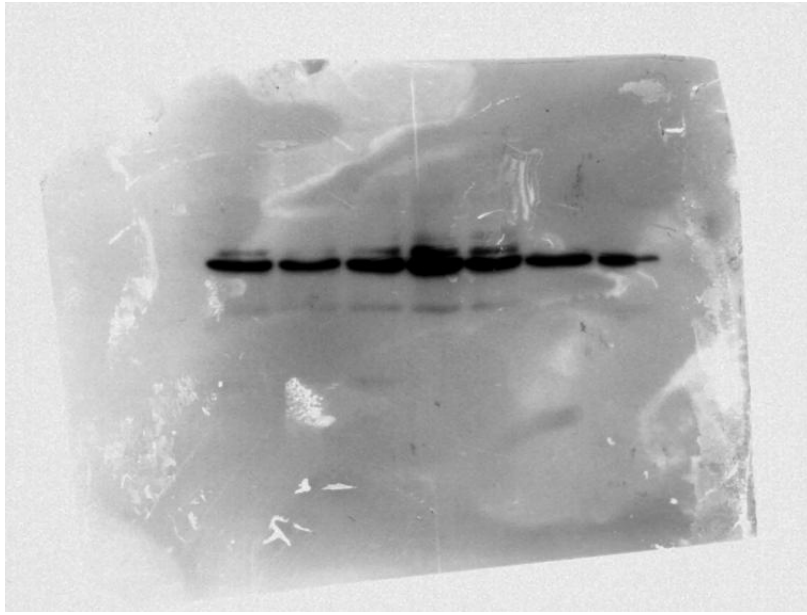

*As*-Cyclin B

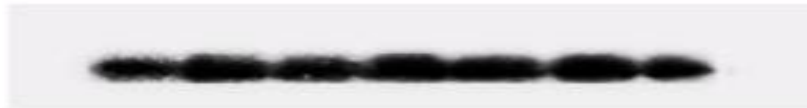

Supplement: srep39047-s1.pdf [file srep39047-s1.pdf]
